# Supplementary material for: The Safety of Low-Molecular-Weight Heparin Bridging Therapy in Patients Receiving Preoperative Oral Antithrombotic Drugs During Spinal Fusion Surgery
Source: Research Square preprint supplement (doi:10.21203/rs.3.rs-8344022/v1), 2026-01-12
Supplement: Supplementary file 1 [file 936691527f9e0c504c06a49b.docx]

Supplementary Table 1. Drugs taken in the Oral Anticoagulation group (n=42)

| Items | n |
| --- | --- |
| Aspirin | 15 |
| Clopidogrel | 19 |
| Aspirin combined with Clopidogrel | 6 |
| Rivaroxaban | 2 |

Supplementary Table 2. Patient and treatment characteristics of the Oral Anticoagulation group and No Oral Anticoagulation group underwent lumbar procedures (n=52)

| Characteristics | Oral Anticoagulation group (n=31) | No Oral Anticoagulation group (n=21) | p value |
| --- | --- | --- | --- |
| Age (years) | 71.63（±8.99） | 67.33（±7.52） | 0.079 |
| Gender |  |  | 0.392 |
| Male  Female | 15  16 | 7  14 |  |
| Surgical Segment |  |  | 0.340 |
| Single  Double  Multiple (≥3) | 20  9  2 | 12  9  0 |  |
| Preoperative Hb (g/L) | 125.48 (±18.49) | 124.95 (±15.81) | 0.915 |
| Preoperative wbc (10^9/L) | 6.80 (±1.88) | 6.94 (±2.89) | 0.957 |
| Preoperative plt (10^9/L) | 225.87 (±82.41) | 229.95 (±59.86) | 0.847 |
| Preoperative APTT (s) | 27.88 (±5.15) | 28.96 (±5.82) | 0.486 |
| Preoperative PT (s) | 11.93 (±0.76) | 11.73 (±0.81) | 0.372 |
| Preoperative PTA (%) | 101.39 (±16.48) | 107.61 (±18.25) | 0.207 |
| Preoperative D-dimer (mg/L FEU) | 0.98 (±1.20) | 1.20 (±1.84) | 0.639 |

a Surgical Segment was defined as the number of intervertebral spaces.

Supplementary Table 3. Patient and treatment characteristics of the Oral Anticoagulation group and No Oral Anticoagulation group underwent cervical procedures (n=21)

| Characteristics | Oral Anticoagulation group (n=11) | No Oral Anticoagulation group (n=10) | p value |
| --- | --- | --- | --- |
| Age (years) | 68.45(±8.56) | 67.50 (±13.19) | 0.845 |
| Gender |  |  | 0.850 |
| Male  Female | 7  4 | 5  5 |  |
| Surgical Segment |  |  | 0.284 |
| Single  Double  Multiple (≥3) | 3  8  0 | 6  4  0 |  |
| Preoperative Hb (g/L) | 131.64 (±13.90) | 121.10 (±16.10) | 0.124 |
| Preoperative wbc (10^9/L) | 6.58 (±1.28) | 6.42 (±2.58) | 0.857 |
| Preoperative plt (10^9/L) | 217.91 (±43.80) | 261.10 (±80.69) | 0.139 |
| Preoperative APTT (s) | 29.14 (±4.43) | 31.06 (±4.97) | 0.360 |
| Preoperative PT (s) | 11.38 (±1.01) | 12.06 (±1.06) | 0.150 |
| Preoperative PTA (%) | 108.30 (±12.71) | 106.53 (±10.04) | 0.734 |
| Preoperative D-dimer (mg/L FEU) | 0.49 (±0.30) | 3.08 (±5.57) | 0.138 |

a Surgical Segment was defined as the number of intervertebral spaces.

Supplementary Table 4. Observational characteristics of the Oral Anticoagulation group and No Oral Anticoagulation group underwent cervical procedures (n=21)

| Characteristics | Oral Anticoagulation group (n=11) | No Oral Anticoagulation group (n=10) | p value |
| --- | --- | --- | --- |
| Postoperative hospital stays (days) | 6.04 (±3.16) | 11.28 (±6.37) | 0.025 |
| Intraoperative blood loss (mL) | 47.27 (±53.12) | 147.00 (±273.25) | 0.284 |
| 3 days drainage (mL) | 143.82 (±212.60) | 179.00 (±413.06) | 0.758 |
| Drainage tube indwelling (days) | 3.30 (±1.25) | 3.10 (±0.88) | 0.684 |
| Overt blood loss (mL) | 182.09 (±262.92) | 326.00 (±681.33) | 0.523 |
| Intraoperative transfusion rate (%) | 9.10 (1/11) | 10.0 (1/10) | 0.943 |
| Postoperative transfusion rate (%) | 0 | 0 | NA |
| Bleeding event | 0 | 0 | NA |

Supplementary Table 5. Patient and treatment characteristics of the Oral Anticoagulation group and No Oral Anticoagulation group underwent single segment lumbar procedures (n=32)

| Characteristics | Oral Anticoagulation group (n=20) | No Oral Anticoagulation group (n=12) | p value |
| --- | --- | --- | --- |
| Age (years) | 72.95 (±9.18) | 67.92 (±7.98) | 0.126 |
| Gender |  |  | 0.307 |
| Male  Female | 10  10 | 3  9 |  |
| Preoperative Hb (g/L) | 126.05 (±19.38) | 128.42 (±16.43) | 0.726 |
| Preoperative wbc (10^9/L) | 5.72 (4.98-8.03) | 5.98 (5.63-8.22) | 0.303 |
| Preoperative plt (10^9/L) | 226.95 (±81.77) | 225.75 (±66.43) | 0.966 |
| Preoperative APTT (s) | 28.59 (±5.62) | 29.88 (±6.23) | 0.550 |
| Preoperative PT (s) | 11.95 (±0.76) | 11.61(±0.97) | 0.285 |
| Preoperative PTA (%) | 105.10 (±15.35) | 114.27 (±20.19) | 0.157 |
| Preoperative D-dimer (mg/L FEU) | 1.10 (±1.39) | 1.13 (±2.18) | 0.958 |

Supplementary Table 6. Patient and treatment characteristics of the Oral Anticoagulation group and No Oral Anticoagulation group underwent double segments lumbar procedures (n=18)

| Characteristics | Oral Anticoagulation group (n=9) | No Oral Anticoagulation group (n=9) | p value |
| --- | --- | --- | --- |
| Age (years) | 69.00 (±5.93) | 66.56 (±7.25) | 0.462 |
| Gender |  |  | 1.000 |
| Male  Female | 4  5 | 4  5 |  |
| Preoperative Hb (g/L) | 123.11 (±10.60) | 120.33 (±14.53) | 0.649 |
| Preoperative wbc (10^9/L) | 6.82 (±1.86) | 8.23 (±3.90) | 0.343 |
| Preoperative plt (10^9/L) | 205.56 (±56.33) | 235.56 (±53.18) | 0.262 |
| Preoperative APTT (s) | 26.51(±4.25) | 27.72 (±5.33) | 0.601 |
| Preoperative PT (s) | 11.79 (±0.55) | 11.90 (±0.54) | 0.672 |
| Preoperative PTA (%) | 97.41 (±14.79) | 98.73 (±10.81) | 0.831 |
| Preoperative D-dimer (mg/L FEU) | 0.52 (0.24-0.85) | 0.39 (0.28-2.80) | 0.240 |

Supplementary Table 7. Patient and treatment characteristics of the Oral Anticoagulation group and No Oral Anticoagulation group underwent single segment cervical procedures (n=9)

| Characteristics | Oral Anticoagulation group (n=3) | No Oral Anticoagulation group (n=6) | p value |
| --- | --- | --- | --- |
| Age (years) | 64.67 (±15.28) | 72.33 (±8.48) | 0.351 |
| Gender |  |  | 0.595 |
| Male  Female | 2  1 | 3  3 |  |
| Preoperative Hb (g/L) | 133.33 (±14.29) | 121.17 (±18.90) | 0.364 |
| Preoperative wbc (10^9/L) | 6.89 (±1.71) | 6.97 (±3.29) | 0.973 |
| Preoperative plt (10^9/L) | 223.33 (±60.87) | 284.50 (±93.42) | 0.345 |
| Preoperative APTT (s) | 30.03 (±4.13) | 30.83 (±3.78) | 0.779 |
| Preoperative PT (s) | 11.43 (±0.64) | 12.02 (±1.04) | 0.411 |
| Preoperative PTA (%) | 110.53 (±17.93) | 100.77 (±6.48) | 0.251 |
| Preoperative D-dimer (mg/L FEU) | 0.28 | 1.41 (0.34-2.94) | 0.660 |

Supplementary Table 8. Patient and treatment characteristics of the Oral Anticoagulation group and No Oral Anticoagulation group underwent double segments cervical procedures (n=12)

| Characteristics | Oral Anticoagulation group (n=8) | No Oral Anticoagulation group (n=4) | p value |
| --- | --- | --- | --- |
| Age (years) | 69.50 (65.25-72.00) | 68.00 (43.00-69.75) | 0.340 |
| Gender |  |  | 0.576 |
| Male  Female | 5  3 | 2  2 |  |
| Preoperative Hb (g/L) | 131.00 (±14.70) | 121.00 (±13.49) | 0.282 |
| Preoperative wbc (10^9/L) | 6.46 (±1.20) | 5.59 (±0.61) | 0.209 |
| Preoperative plt (10^9/L) | 215.88 (±40.80) | 226.00 (±47.42) | 0.708 |
| Preoperative APTT (s) | 28.80 (±4.76) | 31.40 (±7.06) | 0.462 |
| Preoperative PT (s) | 11.36 (±1.16) | 12.13 (±1.24) | 0.318 |
| Preoperative PTA (%) | 107.34 (±11.47) | 115.18 (±8.13) | 0.263 |
| Preoperative D-dimer (mg/L FEU) | 0.37 (0.26-9.38) | 0.98(0.66-14.28) | 0.363 |
